# Supplementary material for: Genetic Variation in the Platelet Endothelial Aggregation Receptor 1 Gene Results in Endothelial Dysfunction
Source: PubMed Central journal article supplement (PMC4583223; doi:10.1371/journal.pone.0138795), 2015-09-25
Supplement: pone.0138795.s001.pdf [file pone.0138795.s001.pdf]

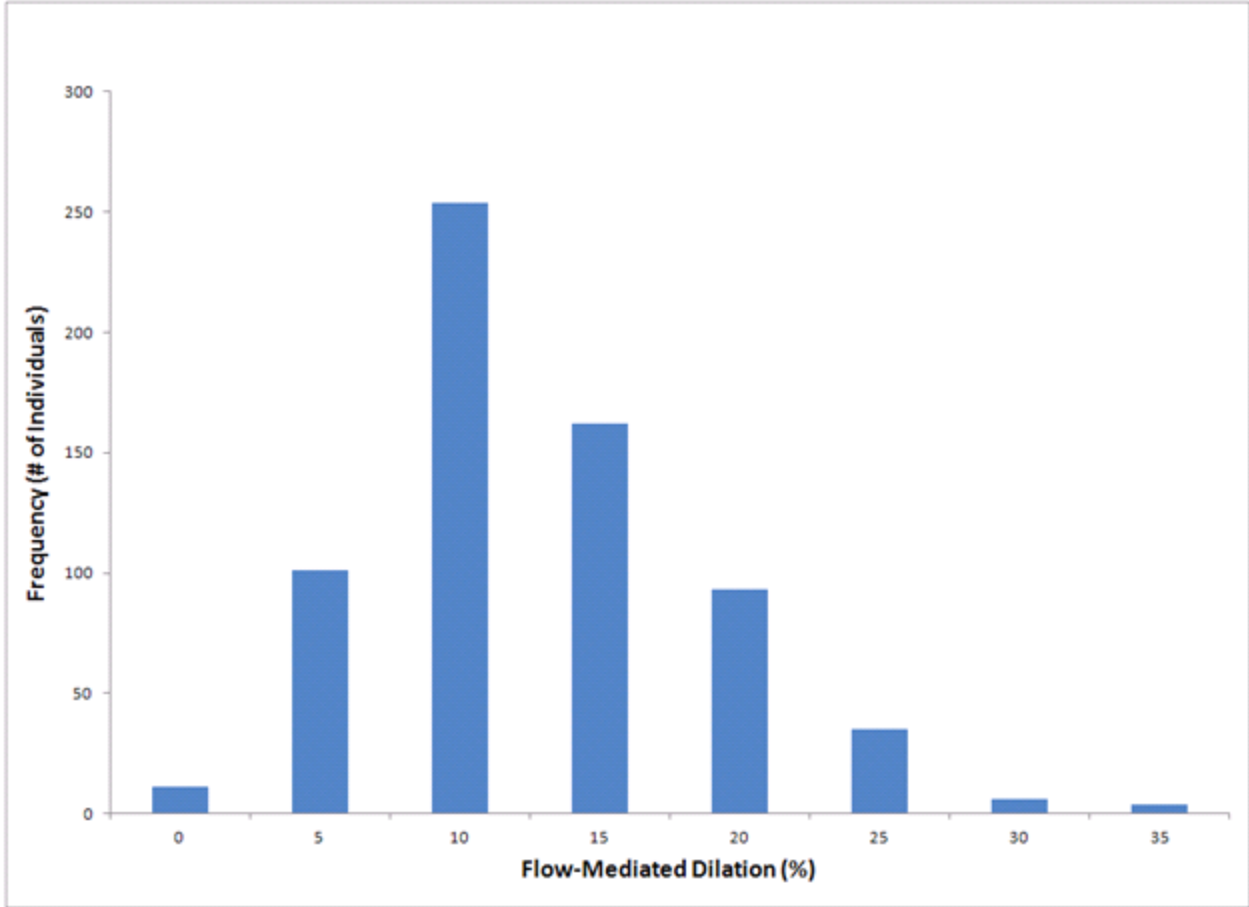

**S1 Fig.** Distribution of Flow-Mediated Dilatation in 641 Amish Participants of the Heredity and Phenotype Intervention (HAPI) Heart Study.
