# Supplementary material for: Genetic Variation in the Platelet Endothelial Aggregation Receptor 1 Gene Results in Endothelial Dysfunction
Source: PubMed Central journal article supplement (PMC4583223; doi:10.1371/journal.pone.0138795), 2015-09-25
Supplement: pone.0138795.s002.pdf [file pone.0138795.s002.pdf]

**S1 Table. Characteristics of HAPI Study Participants by rs12041331 Genotype.**

| Characteristic (Units)                             | PEAR1 rs12041331 Genotype |                  |                  |
|----------------------------------------------------|---------------------------|------------------|------------------|
|                                                    | GG                        | GA               | AA               |
| Number (n)                                         | 535                       | 101              | 5                |
| Age $\pm$ SD (years)                               | 43.2 $\pm$ 13.9           | 43.6 $\pm$ 13.8  | 33.0 $\pm$ 17.2  |
| BMI $\pm$ SD (kg/m <sup>2</sup> )                  | 26.2 $\pm$ 4.0            | 26.9 $\pm$ 4.3   | 26.9 $\pm$ 2.9   |
| No. of female gender (%)                           | 232 (43.4)                | 41 (40.6)        | 3 (60.0)         |
| Brachial artery width pre-occlusion $\pm$ SD (mm)  | 3.8 $\pm$ 3.1             | 3.7 $\pm$ 0.6    | 3.4 $\pm$ 0.6    |
| Brachial artery width post-occlusion $\pm$ SD (mm) | 4.2 $\pm$ 3.3             | 4.1 $\pm$ 0.6    | 3.9 $\pm$ 0.6    |
| Systolic blood pressure $\pm$ SD (mm Hg)           | 121.5 $\pm$ 14.4          | 120.3 $\pm$ 14.7 | 123.0 $\pm$ 11.7 |
| Diastolic blood pressure $\pm$ SD (mm Hg)*         | 77.2 $\pm$ 8.6            | 75.6 $\pm$ 8.7   | 68.4 $\pm$ 4.2   |
| No. with hypertension (%)                          | 71 (13.3)                 | 11 (10.9)        | 0 (0)            |
| Total cholesterol $\pm$ SD (mg/dl)                 | 207.2 $\pm$ 45.7          | 205.4 $\pm$ 51.7 | 183.6 $\pm$ 18.4 |
| LDL cholesterol $\pm$ SD (mg/dl)                   | 138.1 $\pm$ 42.5          | 136.6 $\pm$ 47.2 | 124.4 $\pm$ 17.8 |
| HDL cholesterol $\pm$ SD (mg/dl)                   | 55.9 $\pm$ 13.9           | 55.3 $\pm$ 14.4  | 50.0 $\pm$ 5.6   |
| Triglycerides $\pm$ SD (mg/dl)                     | 66.2 $\pm$ 41.1           | 67.7 $\pm$ 44.5  | 45.8 $\pm$ 15.4  |
| No. with hypercholesteremia (%)                    | 94 (17.7)                 | 14 (13.9)        | 0 (0)            |
| No. with self-reported diabetes (%)                | 3 (0.6)                   | 2 (2.0)          | 0 (0)            |
| Hematocrit $\pm$ SD (%)                            | 41.1 $\pm$ 3.4            | 41.3 $\pm$ 3.1   | 39.6 $\pm$ 5.8   |
| White blood cell count $\pm$ SD (n x 1000)         | 5.3 $\pm$ 1.2             | 5.2 $\pm$ 1.2    | 4.8 $\pm$ 1.3    |
| Platelet count $\pm$ SD (n x 100,000)              | 235.0 $\pm$ 51.8          | 236.5 $\pm$ 50.9 | 259.4 $\pm$ 57.4 |
| No. of current smokers (%)†                        | 56 (10.6)                 | 17 (17.2)        | 0 (0)            |
| No. taking aspirin (%)                             | 14 (2.6)                  | 5 (5.0)          | 0 (0)            |
| No. taking lipid-lowering medications (%)          | 5 (0.9)                   | 2 (2.0)          | 0 (0)            |
| No. taking anti-hypertensive medications (%)       | 1 (0.2)                   | 0 (0)            | 0 (0)            |

\* Diastolic blood pressure was significantly different between genotypes ( $p=0.02$ ). No other traits were significantly different by genotype.

† Observed using a sex-stratified analysis to account for the OOA community's male-only smoking cohort.
