# Supplementary material for: Genetic Variation in the Platelet Endothelial Aggregation Receptor 1 Gene Results in Endothelial Dysfunction
Source: PubMed Central journal article supplement (PMC4583223; doi:10.1371/journal.pone.0138795), 2015-09-25
Supplement: pone.0138795.s003.pdf [file pone.0138795.s003.pdf]

**S2 Table. Genes with expression most highly correlated with *PEAR1*.**

| <b>Gene</b> | <b>Full Name</b>                                                      | <b>Primary Localization</b> |
|-------------|-----------------------------------------------------------------------|-----------------------------|
| CDH5        | cadherin 5, type 2 (vascular endothelium)                             | Plasma membrane             |
| ADCY4       | adenylate cyclase 4                                                   | Plasma membrane             |
| FAM43A      | family with sequence similarity 43, member A                          | Unknown                     |
| MFRP        | membrane frizzled-related protein                                     | Plasma membrane             |
| C1QTNF5     | C1q and tumor necrosis factor related protein 5                       | Extracellular               |
| TIE1        | tyrosine kinase with immunoglobulin-like and EGF-like domains 1       | Plasma membrane             |
| COL8A1      | collagen, type VIII, alpha 1                                          | Extracellular               |
| HHIP-AS1    | HHIP antisense RNA 1                                                  | Unknown                     |
| LDLRAD2     | low density lipoprotein receptor class A domain containing 2          | Plasma membrane             |
| FOXC2       | forkhead box C2 (MFH-1, mesenchyme forkhead 1)                        | Nucleus                     |
| MGP         | matrix Gla protein                                                    | Extracellular               |
| WTAPP1      | Wilms tumor 1 associated protein pseudogene 1                         | Unknown                     |
| RHOJ        | ras homolog family member J                                           | Endosome                    |
| ROBO4       | roundabout, axon guidance receptor, homolog 4 (Drosophila)            | Plasma membrane             |
| ACVRL1      | activin A receptor type II-like 1                                     | Plasma membrane             |
| SERPINE1    | serpin peptidase inhibitor, clade E, member 1                         | Extracellular               |
| SULF1       | sulfatase 1                                                           | Extracellular               |
| MMRN1       | multimerin 1                                                          | Extracellular               |
| HSPG2       | heparan sulfate proteoglycan 2                                        | Extracellular               |
| ECSCR       | endothelial cell surface expressed chemotaxis and apoptosis regulator | Plasma membrane             |
| BTBD19      | BTB (POZ) domain containing 19                                        | Unknown                     |
| HYI         | hydroxypyruvate isomerase (putative)                                  | Nucleus                     |
| MMP1        | matrix metalloproteinase 1 (interstitial collagenase)                 | Extracellular               |
| VWF         | von Willebrand factor                                                 | Extracellular               |
| LAMA4       | laminin, alpha 4                                                      | Extracellular               |
| HHIP        | hedgehog interacting protein                                          | Plasma membrane             |
| EDN1        | endothelin 1                                                          | Extracellular               |
| PTX3        | pentraxin 3, long                                                     | Extracellular               |
| LOC392536   | filamin binding LIM protein 1 pseudogene                              | Unknown                     |
| TGFB11      | transforming growth factor beta 1 induced transcript 1                | Nucleus                     |
| BCL6B       | B-cell CLL/lymphoma 6, member B                                       | Nucleus                     |
| SPHK1       | sphingosine kinase 1                                                  | Cytoplasm                   |
| ENG         | endoglin                                                              | Plasma membrane             |

|              |                                                                                           |                 |
|--------------|-------------------------------------------------------------------------------------------|-----------------|
| TNFRSF10D    | tumor necrosis factor receptor superfamily, member 10d, decoy with truncated death domain | Plasma membrane |
| VWFP1        | von Willebrand factor pseudogene 1                                                        | Unknown         |
| MMRN2        | multimerin 2                                                                              | Extracellular   |
| ESM1         | endothelial cell-specific molecule 1                                                      | Extracellular   |
| EFEMP1       | EGF containing fibulin-like extracellular matrix protein 1                                | Extracellular   |
| GLCE         | glucuronic acid epimerase                                                                 | Golgi apparatus |
| LOC101928281 | uncharacterized LOC101928281                                                              | Unknown         |
| CTGF         | connective tissue growth factor                                                           | Extracellular   |
| NR2F2        | nuclear receptor subfamily 2, group F, member 2                                           | Nucleus         |
| ITGA5        | integrin, alpha 5 (fibronectin receptor, alpha polypeptide)                               | Plasma membrane |
| PLSCR4       | phospholipid scramblase 4                                                                 | Plasma membrane |
| GPR126       | G protein-coupled receptor 126                                                            | Plasma membrane |
| THBS1        | thrombospondin 1                                                                          | Extracellular   |
| ANKRD1       | ankyrin repeat domain 1 (cardiac muscle)                                                  | Nucleus         |
| ROBO3        | roundabout, axon guidance receptor, homolog 3 (Drosophila)                                | Plasma membrane |
| EGFL7        | EGF-like-domain, multiple 7                                                               | Extracellular   |

---
