# Supplementary material for: Genetic Variation in the Platelet Endothelial Aggregation Receptor 1 Gene Results in Endothelial Dysfunction
Source: PubMed Central journal article supplement (PMC4583223; doi:10.1371/journal.pone.0138795), 2015-09-25
Supplement: pone.0138795.s004.pdf [file pone.0138795.s004.pdf]

**S3 Table. Most highly predicted phenotypes for *PEAR1*.**

| <b>Phenotype</b>               | <b># of Shared Relationships</b> | <b>Score</b> |
|--------------------------------|----------------------------------|--------------|
| Endothelial cell migration     | 12                               | 136          |
| Vasculogenesis                 | 11                               | 103          |
| Angiogenesis                   | 20                               | 86           |
| Lymphangiogenesis              | 8                                | 70           |
| Neovascularization             | 11                               | 57           |
| Endothelial cell proliferation | 9                                | 55           |
| Platelet aggregation           | 7                                | 55           |
| Cell adhesion                  | 15                               | 52           |
| Paracrine Signaling            | 13                               | 51           |
| Cell migration                 | 14                               | 51           |
| Embryonic development          | 14                               | 47           |
| Focal adhesions                | 9                                | 45           |
| Dermal fibroblasts             | 9                                | 42           |
| Hypoxia-inducible              | 10                               | 41           |
| Endothelial cell surface       | 6                                | 40           |
| Cell motility                  | 10                               | 38           |
| Endothelial cell growth        | 6                                | 38           |
| Transdifferentiation           | 7                                | 37           |
| DNA methylation                | 11                               | 37           |
| Tyrosine phosphorylation       | 11                               | 36           |
| Leukocyte extravasation        | 5                                | 36           |
| Signal transduction            | 15                               | 36           |
| Retinal endothelial cell       | 5                                | 35           |
| Carotid artery                 | 11                               | 34           |
| Chemotaxis                     | 10                               | 34           |
| Wound healing                  | 11                               | 34           |
| Angiogenesis inhibitors        | 7                                | 33           |
| Angiogenic phenotype           | 5                                | 33           |
| Cell proliferation             | 16                               | 33           |
| Nuclear translocation          | 10                               | 32           |
| Signal transduction pathways   | 11                               | 32           |
| Cell differentiation           | 12                               | 31           |
| Regulation of angiogenesis     | 5                                | 30           |
| Heparin binding                | 7                                | 30           |
| Clopidogrel                    | 5                                | 29           |
| Response to LPS                | 7                                | 29           |
| Tissue homeostasis             | 7                                | 29           |
| Adiponectin levels             | 6                                | 29           |
| Morphogenesis                  | 10                               | 29           |
| Sprouting angiogenesis         | 4                                | 28           |

|                            |   |    |
|----------------------------|---|----|
| Capillary morphogenesis    | 4 | 28 |
| Glomerular filtration rate | 7 | 19 |
| Phagocytosis               | 8 | 18 |

---
