# Supplementary material for: Genetic Variation in the Platelet Endothelial Aggregation Receptor 1 Gene Results in Endothelial Dysfunction
Source: PubMed Central journal article supplement (PMC4583223; doi:10.1371/journal.pone.0138795), 2015-09-25
Supplement: pone.0138795.s005.pdf [file pone.0138795.s005.pdf]

**S4 Table. Predicted diseases relevant to *PEAR1* Dysregulation.**

| <b>Disease</b>                     | <b># of Shared Relationships</b> | <b>Score</b> |
|------------------------------------|----------------------------------|--------------|
| Vascular disease                   | 12                               | 59           |
| Non-small cell lung carcinoma      | 14                               | 55           |
| Osteoarthritis                     | 11                               | 46           |
| Preeclampsia                       | 10                               | 42           |
| Pancreatic cancer                  | 12                               | 40           |
| Diabetic nephropathy               | 9                                | 39           |
| Colorectal cancer                  | 14                               | 39           |
| Lymph node metastasis              | 9                                | 37           |
| Melanoma                           | 13                               | 36           |
| Breast cancer                      | 16                               | 35           |
| Coronary artery disease            | 12                               | 33           |
| MDA-MB-231 breast cancer           | 6                                | 33           |
| Metastatic disease                 | 11                               | 33           |
| Intimal hyperplasia                | 6                                | 33           |
| Mammary tumor                      | 11                               | 33           |
| Chronic kidney disease             | 9                                | 32           |
| Gastric cancer                     | 11                               | 32           |
| Pulmonary arterial hypertension    | 7                                | 32           |
| Atherosclerotic plaque             | 7                                | 32           |
| Systemic sclerosis                 | 8                                | 31           |
| Angiosarcoma                       | 6                                | 31           |
| Insulin resistance                 | 11                               | 30           |
| Renal disease                      | 10                               | 30           |
| Liver fibrosis                     | 8                                | 29           |
| Proliferative diabetic retinopathy | 5                                | 29           |
| Myocardial infarction              | 11                               | 28           |
| Kidney disease                     | 8                                | 27           |
